# Supplementary material for: Climate-driven desertification triggered the end of the Ancient Silk Road
Source: Copernicus journal article supplement (doi:10.5194/cp-2020-102), 2020-08-07
Supplement: Supplementary file 1 [file cp-2020-102-supplement.pdf]

Figure S1. Comparison of the longitude and median dates of Bronze Age cultural sites in the western Hexi corridor and eastern Xinjiang Province. The purple rectangle corresponds to an absence of dates in the western Hexi Corridor and Xinjiang province. The purple line shows the longitude of the XSW section.

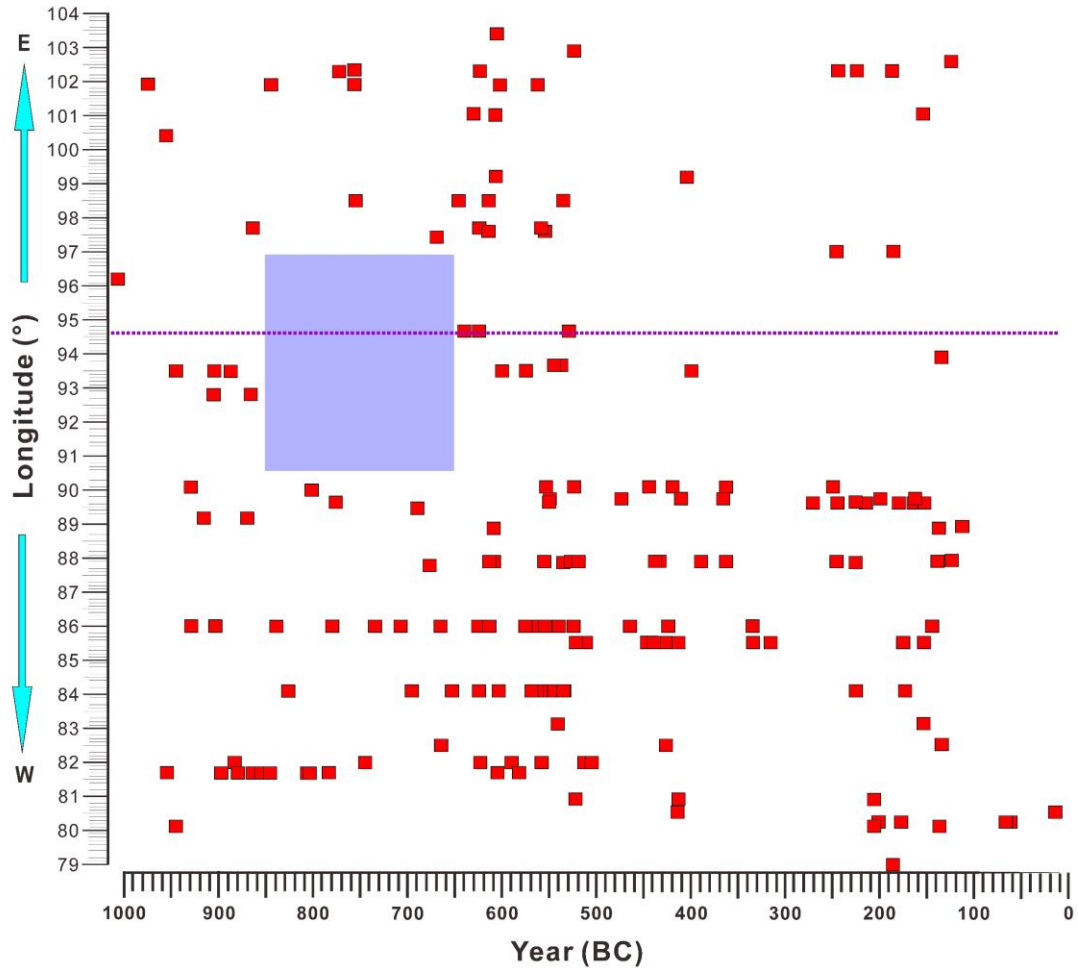

Figure S1.
